# Supplementary material for: Investigation of electronic properties of chemical vapor deposition grown single layer graphene via doping of thin transparent conductive films
Source: Royal Society of Chemistry journal article supplement (doi:10.1039/d0ra10057a), 2021-01-01
Supplement: d0ra10057a1.pdf [file d0ra10057a1.pdf]

## Supporting information

### **Investigation of electronic properties of chemical vapor deposition grown single layer graphene via doping of thin transparent conductive films**

Anand Kumar Singh,<sup>1</sup> Vivek Chaudhary,<sup>2</sup> Arun Kumar Singh,<sup>3\*</sup> S. R. P. Sinha<sup>1</sup>

<sup>1</sup>Department of Electronics and Communication Engineering, Institute of Engineering and Technology, Lucknow 226021, India.

<sup>2</sup>Department of Physics, Motilal Nehru National Institute of Technology Allahabad, Prayagraj, 211004, India.

<sup>3</sup>Department of Pure and Applied Physics, Guru Ghasidas Vishwavidyalaya, Bilaspur 495009 (C.G.), India.

\*Corresponding Author: [arunsingh.itbhu@gmail.com](mailto:arunsingh.itbhu@gmail.com)

### Thickness measurement of 0.78 w/v PEDOT: PSS film.

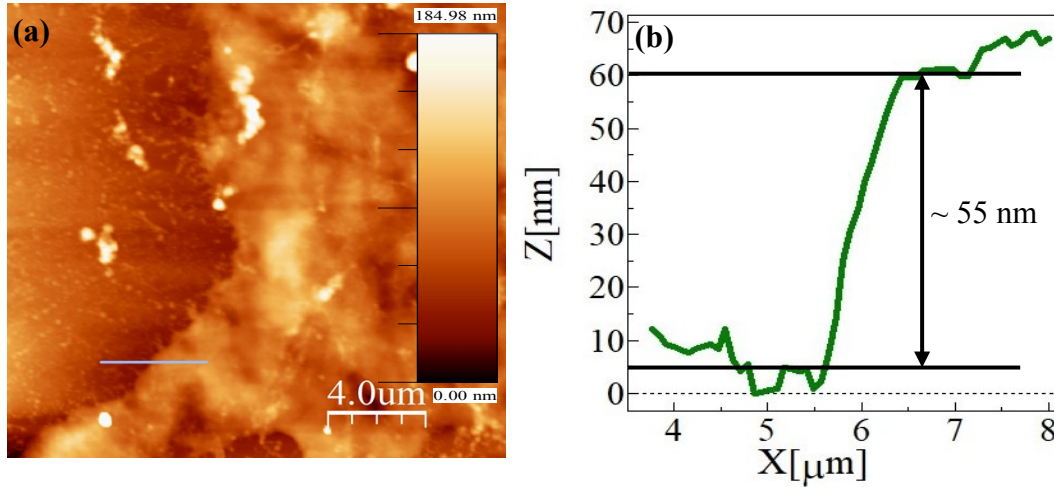

**Fig.S1.** (a) AFM image of 0.78 w/v PEDOT:PSS film and (b) height profile for the thickness measurement

### KPFM technique for work function measurement

In brief, when a conducting cantilever tip is kept near the sample surface in the KPFM measurement, an electrical force is produced between the sample and tip due to the differences in their Fermi energy levels. The cantilever tip used for KPFM measurement is selected to be a different material to the sample, therefore the work function of the sample ( $\phi_{\text{sample}}$ ) and tip ( $\phi_{\text{tip}}$ ) are different. The energy diagram representing the sample and tip Fermi level is shown in Fig.1. The energy levels of the sample and tip are shown in Fig. 1(a), where the sample and tip are separated by distance (d), and no electrical connection is established between them. Also, the Fermi energy levels of sample and tip are different but their vacuum levels are aligned. For the requirement of thermodynamic equilibrium, if the sample and tip are in contact both have equal Fermi levels. When the sample and tip are in contact electrically, electrons transfer from higher Fermi level to lower Fermi level and cause the system will reach an equilibrium condition (Fig.

1(b)). Furthermore, a surface charge developed on the tip and sample, with an apparent potential difference such as contact potential difference ( $V_{CPD}$ ) will form. An external dc potential ( $V_{DC}$ ) equal  $-V_{CPD}$  can be applied to eliminate the surface charge between tip and sample is shown in Fig. 1(c). When the charge on the sample and tip is eliminated, the Fermi level of the sample shifted to its original position. This means that the value of external potential ( $V_{DC}$ ) that eliminates the charges developed by the  $V_{CPD}$  is equal to the difference between  $\phi_{tip}$  and  $\phi_{sample}$ . Therefore,  $\phi_{sample}$  can be calculated only when the  $\phi_{tip}$  is known.

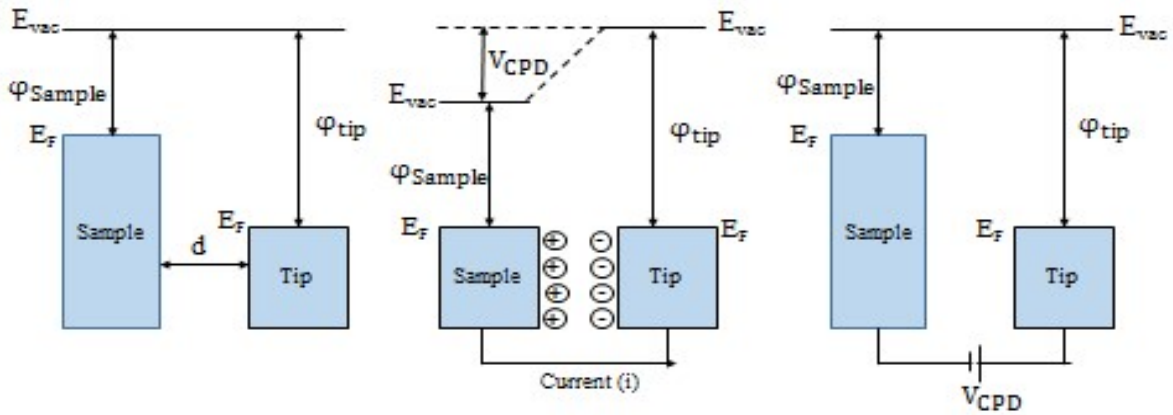

**Fig. S2.** Electronic Energy levels of the sample and AFM tip for (a) sample and tip are separated with no electrical contact, (b) the sample and tip are in electrical contact, and (c) An external potential ( $V_{DC}$ ) is applied between sample and tip to eliminate the charge generated by  $V_{CPD}$ . In the diagram,  $E_{vac}$  is the vacuum energy level and  $E_F$  is the Fermi energy level.
